# Supplementary material for: Ion Channel Gene Expression in Lung Adenocarcinoma: Potential Role in Prognosis and Diagnosis
Source: PubMed Central journal article supplement (PMC3900557; doi:10.1371/journal.pone.0086569), 2014-01-23

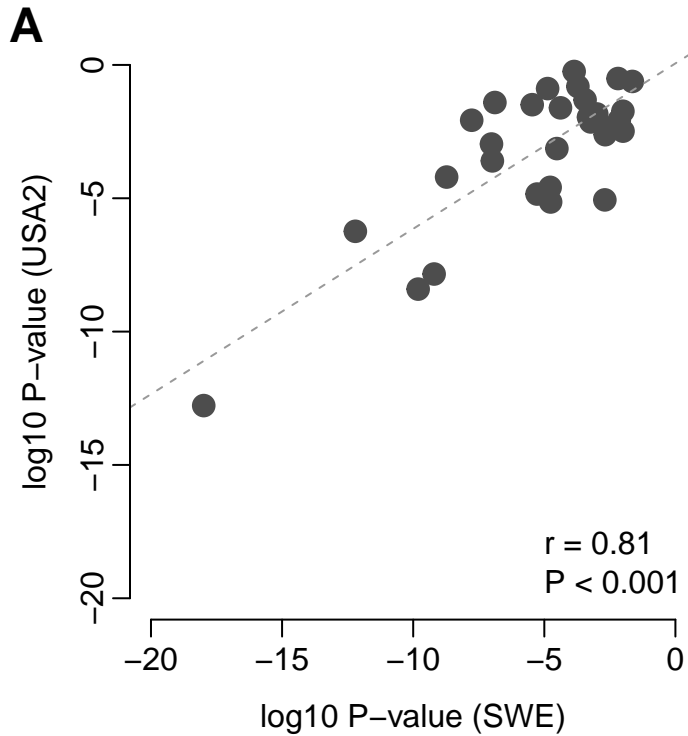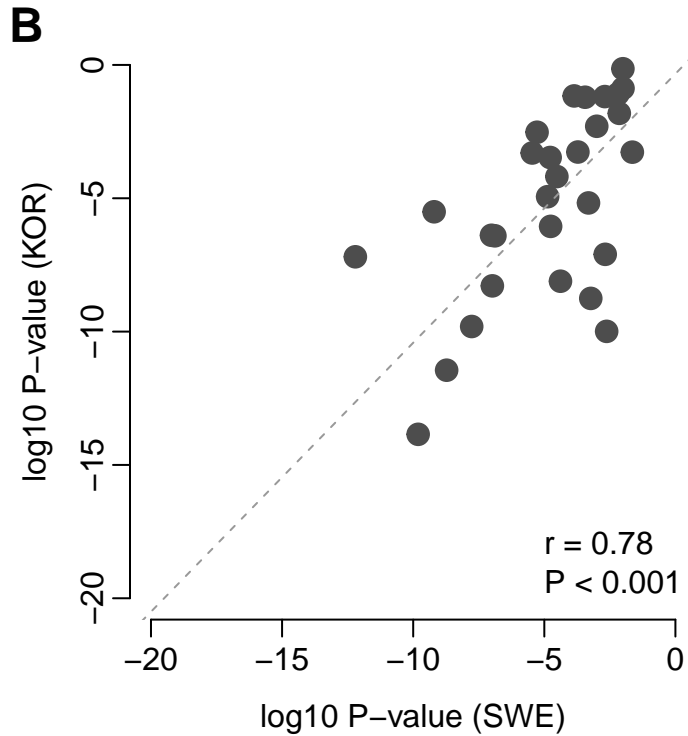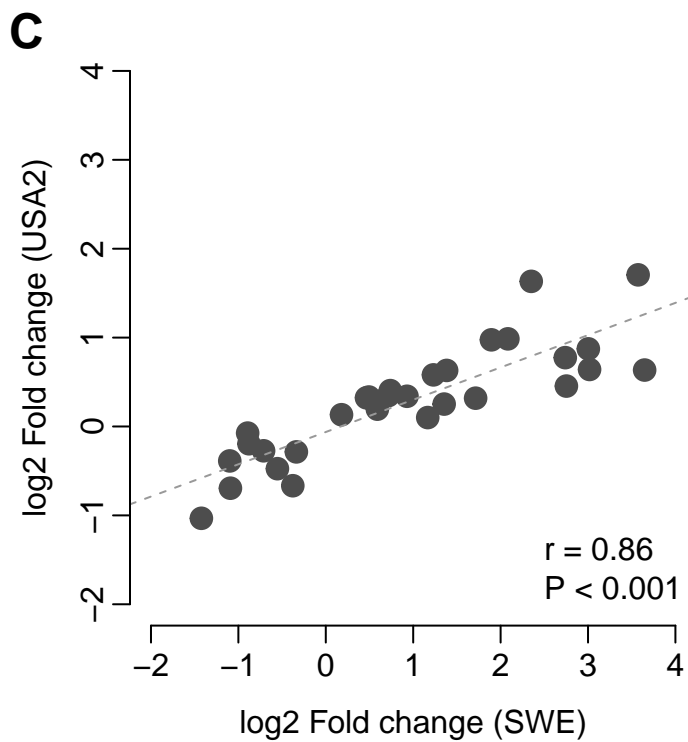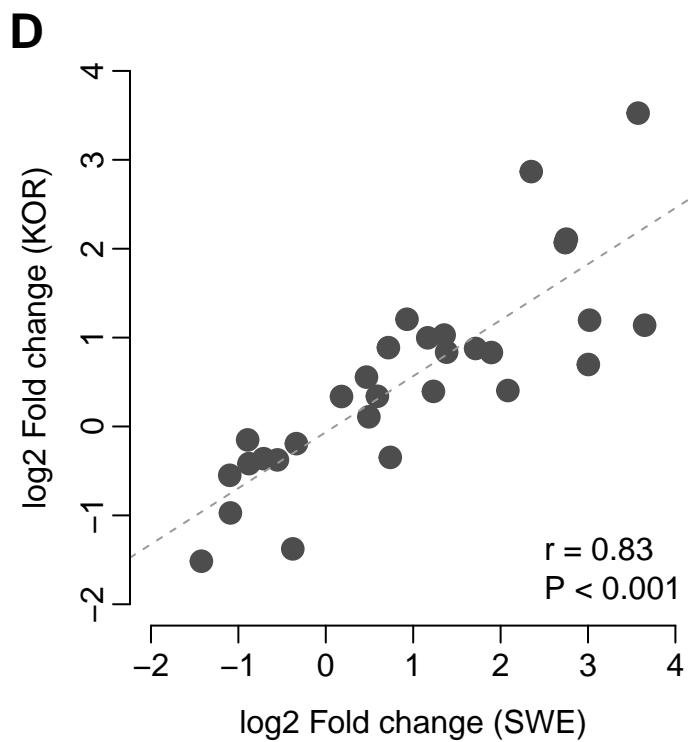

Supplement: pone.0086569.s005.pdf [file pone.0086569.s005.pdf]
