# Supplementary material for: Ion Channel Gene Expression in Lung Adenocarcinoma: Potential Role in Prognosis and Diagnosis
Source: PubMed Central journal article supplement (PMC3900557; doi:10.1371/journal.pone.0086569), 2014-01-23
Supplement: pone.0086569.s008.pdf [file pone.0086569.s008.pdf]

Table S1. Gene expression datasets of lung cancer from GEO database

| Organization of data source                      | Abbreviation | GEO accession | Platform                              | Samples size <sup>a</sup> | Paired |
|--------------------------------------------------|--------------|---------------|---------------------------------------|---------------------------|--------|
| National Cancer Center Research Institute, Japan | JPN          | GSE31210      | Affymetrix Human Genome U133 Plus 2.0 | A: 226                    | No     |
| Samsung Medical Center, Korea                    | KOR          | GSE8894       | Affymetrix Human Genome U133 Plus 2.0 | A: 63; S: 75              | No     |
| Uppsala Array Platform, Sweden                   | SWE          | GSE28571      | Affymetrix Human Genome U133 Plus 2.0 | A: 50; S: 28              | No     |
| National Taiwan University, Taiwan               | TWN          | GSE19804      | Affymetrix Human Genome U133 Plus 2.0 | A: 56; N: 56              | Yes    |
| National Cancer Institute, United States         | USA1         | GSE10072      | Affymetrix Human Genome U133A         | A: 33; N: 33              | Yes    |
| Duke University, United States                   | USA2         | GSE3141       | Affymetrix Human Genome U133 Plus 2.0 | A: 58; S: 53              | No     |

<sup>a</sup> Only the samples used in this study were counted. A: lung adenocarcinoma tumor sample; S: squamous-cell lung carcinoma tumor sample; N: paired normal sample.
