# Supplementary material for: Ion Channel Gene Expression in Lung Adenocarcinoma: Potential Role in Prognosis and Diagnosis
Source: PubMed Central journal article supplement (PMC3900557; doi:10.1371/journal.pone.0086569), 2014-01-23
Supplement: pone.0086569.s009.pdf [file pone.0086569.s009.pdf]

Table S2. Ion channel genes involved in this study

| Gene symbol     | Gene title                                                     | Channel type                       |
|-----------------|----------------------------------------------------------------|------------------------------------|
| <i>ANO1</i>     | anoctamin 1, Calcium activated chloride channel                | Calcium activated chloride channel |
| <i>ANO2</i>     | anoctamin 2                                                    | Calcium activated chloride channel |
| <i>CACNA1A</i>  | calcium channel, voltage-dependent, P/Q type, alpha 1A subunit | Voltage-gated calcium channels     |
| <i>CACNA1B</i>  | calcium channel, voltage-dependent, N type, alpha 1B subunit   | Voltage-gated calcium channels     |
| <i>CACNA1C</i>  | calcium channel, voltage-dependent, L type, alpha 1C subunit   | Voltage-gated calcium channels     |
| <i>CACNA1D</i>  | calcium channel, voltage-dependent, L type, alpha 1D subunit   | Voltage-gated calcium channels     |
| <i>CACNA1E</i>  | calcium channel, voltage-dependent, R type, alpha 1E subunit   | Voltage-gated calcium channels     |
| <i>CACNA1F</i>  | calcium channel, voltage-dependent, L type, alpha 1F subunit   | Voltage-gated calcium channels     |
| <i>CACNA1G</i>  | calcium channel, voltage-dependent, T type, alpha 1G subunit   | Voltage-gated calcium channels     |
| <i>CACNA1H</i>  | calcium channel, voltage-dependent, T type, alpha 1H subunit   | Voltage-gated calcium channels     |
| <i>CACNA1I</i>  | calcium channel, voltage-dependent, T type, alpha 1I subunit   | Voltage-gated calcium channels     |
| <i>CACNA1S</i>  | calcium channel, voltage-dependent, L type, alpha 1S subunit   | Voltage-gated calcium channels     |
| <i>CACNA2D1</i> | calcium channel, voltage-dependent, alpha 2/delta subunit 1    | Voltage-gated calcium channels     |
| <i>CACNA2D2</i> | calcium channel, voltage-dependent, alpha 2/delta subunit 2    | Voltage-gated calcium channels     |
| <i>CACNA2D3</i> | calcium channel, voltage-dependent, alpha 2/delta subunit 3    | Voltage-gated calcium channels     |
| <i>CACNA2D4</i> | calcium channel, voltage-dependent, alpha 2/delta subunit 4    | Voltage-gated calcium channels     |
| <i>CACNB1</i>   | calcium channel, voltage-dependent, beta 1 subunit             | Voltage-gated calcium channels     |
| <i>CACNB2</i>   | calcium channel, voltage-dependent, beta 2 subunit             | Voltage-gated calcium channels     |
| <i>CACNB3</i>   | calcium channel, voltage-dependent, beta 3 subunit             | Voltage-gated calcium channels     |
| <i>CACNB4</i>   | calcium channel, voltage-dependent, beta 4 subunit             | Voltage-gated calcium channels     |
| <i>CACNG1</i>   | calcium channel, voltage-dependent, gamma subunit 1            | Voltage-gated calcium channels     |
| <i>CACNG2</i>   | calcium channel, voltage-dependent, gamma subunit 2            | Voltage-gated calcium channels     |
| <i>CACNG3</i>   | calcium channel, voltage-dependent, gamma subunit 3            | Voltage-gated calcium channels     |
| <i>CACNG4</i>   | calcium channel, voltage-dependent, gamma subunit 4            | Voltage-gated calcium channels     |
| <i>CACNG5</i>   | calcium channel, voltage-dependent, gamma subunit 5            | Voltage-gated calcium channels     |
| <i>CACNG6</i>   | calcium channel, voltage-dependent, gamma subunit 6            | Voltage-gated calcium channels     |
| <i>CACNG7</i>   | calcium channel, voltage-dependent, gamma subunit 7            | Voltage-gated calcium channels     |
| <i>CACNG8</i>   | calcium channel, voltage-dependent, gamma subunit 8            | Voltage-gated calcium channels     |
| <i>CATSPER1</i> | cation channel, sperm associated 1                             | CatSper and Two-Pore channels      |
| <i>CATSPER2</i> | cation channel, sperm associated 2                             | CatSper and Two-Pore channels      |
| <i>CATSPER3</i> | cation channel, sperm associated 3                             | CatSper and Two-Pore channels      |
| <i>CATSPER4</i> | cation channel, sperm associated 4                             | CatSper and Two-Pore channels      |
| <i>CATSPERB</i> | catsper channel auxiliary subunit beta                         | CatSper and Two-Pore channels      |
| <i>CATSPERD</i> | catsper channel auxiliary subunit delta                        | CatSper and Two-Pore channels      |
| <i>CATSPERG</i> | catsper channel auxiliary subunit gamma                        | CatSper and Two-Pore channels      |
| <i>CHRNA1</i>   | cholinergic receptor, nicotinic, alpha 1 (muscle)              | Nicotinic acetylcholine receptors  |
| <i>CHRNA10</i>  | cholinergic receptor, nicotinic, alpha 10 (neuronal)           | Nicotinic acetylcholine receptors  |
| <i>CHRNA2</i>   | cholinergic receptor, nicotinic, alpha 2 (neuronal)            | Nicotinic acetylcholine receptors  |
| <i>CHRNA3</i>   | cholinergic receptor, nicotinic, alpha 3 (neuronal)            | Nicotinic acetylcholine receptors  |

| Gene symbol    | Gene title                                          | Channel type                         |
|----------------|-----------------------------------------------------|--------------------------------------|
| <i>CHRNA4</i>  | cholinergic receptor, nicotinic, alpha 4 (neuronal) | Nicotinic acetylcholine receptors    |
| <i>CHRNA5</i>  | cholinergic receptor, nicotinic, alpha 5 (neuronal) | Nicotinic acetylcholine receptors    |
| <i>CHRNA6</i>  | cholinergic receptor, nicotinic, alpha 6 (neuronal) | Nicotinic acetylcholine receptors    |
| <i>CHRNA7</i>  | cholinergic receptor, nicotinic, alpha 7 (neuronal) | Nicotinic acetylcholine receptors    |
| <i>CHRNA9</i>  | cholinergic receptor, nicotinic, alpha 9 (neuronal) | Nicotinic acetylcholine receptors    |
| <i>CHRNB1</i>  | cholinergic receptor, nicotinic, beta 1 (muscle)    | Nicotinic acetylcholine receptors    |
| <i>CHRNB2</i>  | cholinergic receptor, nicotinic, beta 2 (neuronal)  | Nicotinic acetylcholine receptors    |
| <i>CHRNB3</i>  | cholinergic receptor, nicotinic, beta 3 (neuronal)  | Nicotinic acetylcholine receptors    |
| <i>CHRNB4</i>  | cholinergic receptor, nicotinic, beta 4 (neuronal)  | Nicotinic acetylcholine receptors    |
| <i>CHRND</i>   | cholinergic receptor, nicotinic, delta (muscle)     | Nicotinic acetylcholine receptors    |
| <i>CHRNE</i>   | cholinergic receptor, nicotinic, epsilon (muscle)   | Nicotinic acetylcholine receptors    |
| <i>CHRNG</i>   | cholinergic receptor, nicotinic, gamma (muscle)     | Nicotinic acetylcholine receptors    |
| <i>CLCA1</i>   | chloride channel accessory 1                        | Calcium activated chloride channel   |
| <i>CLCA2</i>   | chloride channel accessory 2                        | Calcium activated chloride channel   |
| <i>CLCA3</i>   | chloride channel accessory 3                        | Calcium activated chloride channel   |
| <i>CLCC1</i>   | chloride channel CLIC-like 1                        | Mid-1-related chloride channel       |
| <i>CLCN1</i>   | chloride channel, voltage-sensitive 1               | Voltage-sensitive chloride channel   |
| <i>CLCN2</i>   | chloride channel, voltage-sensitive 2               | Voltage-sensitive chloride channel   |
| <i>CLCN3</i>   | chloride channel, voltage-sensitive 3               | Voltage-sensitive chloride channel   |
| <i>CLCN4</i>   | chloride channel, voltage-sensitive 4               | Voltage-sensitive chloride channel   |
| <i>CLCN5</i>   | chloride channel, voltage-sensitive 5               | Voltage-sensitive chloride channel   |
| <i>CLCN6</i>   | chloride channel, voltage-sensitive 6               | Voltage-sensitive chloride channel   |
| <i>CLCN7</i>   | chloride channel, voltage-sensitive 7               | Voltage-sensitive chloride channel   |
| <i>CLCNKA</i>  | chloride channel, voltage-sensitive Ka              | Voltage-sensitive chloride channel   |
| <i>CLCNKB</i>  | chloride channel, voltage-sensitive Kb              | Voltage-sensitive chloride channel   |
| <i>CLIC1</i>   | chloride intracellular channel 1                    | Chloride intracellular channel       |
| <i>CLIC2</i>   | chloride intracellular channel 2                    | Chloride intracellular channel       |
| <i>CLIC3</i>   | chloride intracellular channel 3                    | Chloride intracellular channel       |
| <i>CLIC4</i>   | chloride intracellular channel 4                    | Chloride intracellular channel       |
| <i>CLIC5</i>   | chloride intracellular channel 5                    | Chloride intracellular channel       |
| <i>CLIC6</i>   | chloride intracellular channel 6                    | Chloride intracellular channel       |
| <i>CNGA1</i>   | cyclic nucleotide gated channel alpha 1             | Cyclic nucleotide-regulated channels |
| <i>CNGA2</i>   | cyclic nucleotide gated channel alpha 2             | Cyclic nucleotide-regulated channels |
| <i>CNGA3</i>   | cyclic nucleotide gated channel alpha 3             | Cyclic nucleotide-regulated channels |
| <i>CNGA4</i>   | cyclic nucleotide gated channel alpha 4             | Cyclic nucleotide-regulated channels |
| <i>CNGB1</i>   | cyclic nucleotide gated channel beta 1              | Cyclic nucleotide-regulated channels |
| <i>CNGB3</i>   | cyclic nucleotide gated channel beta 3              | Cyclic nucleotide-regulated channels |
| <i>GABARAP</i> | GABA(A) receptor-associated protein                 | GABA <sub>A</sub> receptors          |
| <i>GABRA1</i>  | gamma-aminobutyric acid (GABA) A receptor, alpha 1  | GABA <sub>A</sub> receptors          |
| <i>GABRA2</i>  | gamma-aminobutyric acid (GABA) A receptor, alpha 2  | GABA <sub>A</sub> receptors          |
| <i>GABRA3</i>  | gamma-aminobutyric acid (GABA) A receptor, alpha 3  | GABA <sub>A</sub> receptors          |
| <i>GABRA4</i>  | gamma-aminobutyric acid (GABA) A receptor, alpha 4  | GABA <sub>A</sub> receptors          |
| <i>GABRA5</i>  | gamma-aminobutyric acid (GABA) A receptor, alpha 5  | GABA <sub>A</sub> receptors          |
| <i>GABRA6</i>  | gamma-aminobutyric acid (GABA) A receptor, alpha 6  | GABA <sub>A</sub> receptors          |

| Gene symbol   | Gene title                                                              | Channel type                         |
|---------------|-------------------------------------------------------------------------|--------------------------------------|
| <i>GABRB1</i> | gamma-aminobutyric acid (GABA) A receptor, beta 1                       | GABA <sub>A</sub> receptors          |
| <i>GABRB2</i> | gamma-aminobutyric acid (GABA) A receptor, beta 2                       | GABA <sub>A</sub> receptors          |
| <i>GABRB3</i> | gamma-aminobutyric acid (GABA) A receptor, beta 3                       | GABA <sub>A</sub> receptors          |
| <i>GABRD</i>  | gamma-aminobutyric acid (GABA) A receptor, delta                        | GABA <sub>A</sub> receptors          |
| <i>GABRE</i>  | gamma-aminobutyric acid (GABA) A receptor, epsilon                      | GABA <sub>A</sub> receptors          |
| <i>GABRG1</i> | gamma-aminobutyric acid (GABA) A receptor, gamma 1                      | GABA <sub>A</sub> receptors          |
| <i>GABRG2</i> | gamma-aminobutyric acid (GABA) A receptor, gamma 2                      | GABA <sub>A</sub> receptors          |
| <i>GABRG3</i> | gamma-aminobutyric acid (GABA) A receptor, gamma 3                      | GABA <sub>A</sub> receptors          |
| <i>GABRP</i>  | gamma-aminobutyric acid (GABA) A receptor, pi                           | GABA <sub>A</sub> receptors          |
| <i>GABRQ</i>  | gamma-aminobutyric acid (GABA) A receptor, theta                        | GABA <sub>A</sub> receptors          |
| <i>GABRR1</i> | gamma-aminobutyric acid (GABA) A receptor, rho 1                        | GABA <sub>A</sub> receptors          |
| <i>GABRR2</i> | gamma-aminobutyric acid (GABA) A receptor, rho 2                        | GABA <sub>A</sub> receptors          |
| <i>GABRR3</i> | gamma-aminobutyric acid (GABA) A receptor, rho 3                        | GABA <sub>A</sub> receptors          |
| <i>GLRA1</i>  | glycine receptor, alpha 1                                               | Glycine receptors                    |
| <i>GLRA2</i>  | glycine receptor, alpha 2                                               | Glycine receptors                    |
| <i>GLRA3</i>  | glycine receptor, alpha 3                                               | Glycine receptors                    |
| <i>GLRA4</i>  | glycine receptor, alpha 4                                               | Glycine receptors                    |
| <i>GLRB</i>   | glycine receptor, beta                                                  | Glycine receptors                    |
| <i>GRIA1</i>  | glutamate receptor, ionotropic, AMPA 1                                  | Ionotropic glutamate receptors       |
| <i>GRIA2</i>  | glutamate receptor, ionotropic, AMPA 2                                  | Ionotropic glutamate receptors       |
| <i>GRIA3</i>  | glutamate receptor, ionotropic, AMPA 3                                  | Ionotropic glutamate receptors       |
| <i>GRIA4</i>  | glutamate receptor, ionotropic, AMPA 4                                  | Ionotropic glutamate receptors       |
| <i>GRID1</i>  | glutamate receptor, ionotropic, delta 1                                 | Ionotropic glutamate receptors       |
| <i>GRID2</i>  | glutamate receptor, ionotropic, delta 2                                 | Ionotropic glutamate receptors       |
| <i>GRIK1</i>  | glutamate receptor, ionotropic, kainate 1                               | Ionotropic glutamate receptors       |
| <i>GRIK2</i>  | glutamate receptor, ionotropic, kainate 2                               | Ionotropic glutamate receptors       |
| <i>GRIK3</i>  | glutamate receptor, ionotropic, kainate 3                               | Ionotropic glutamate receptors       |
| <i>GRIK4</i>  | glutamate receptor, ionotropic, kainate 4                               | Ionotropic glutamate receptors       |
| <i>GRIK5</i>  | glutamate receptor, ionotropic, kainate 5                               | Ionotropic glutamate receptors       |
| <i>GRIN1</i>  | glutamate receptor, ionotropic, N-methyl D-aspartate 1                  | Ionotropic glutamate receptors       |
| <i>GRIN2A</i> | glutamate receptor, ionotropic, N-methyl D-aspartate 2A                 | Ionotropic glutamate receptors       |
| <i>GRIN2B</i> | glutamate receptor, ionotropic, N-methyl D-aspartate 2B                 | Ionotropic glutamate receptors       |
| <i>GRIN2C</i> | glutamate receptor, ionotropic, N-methyl D-aspartate 2C                 | Ionotropic glutamate receptors       |
| <i>GRIN2D</i> | glutamate receptor, ionotropic, N-methyl D-aspartate 2D                 | Ionotropic glutamate receptors       |
| <i>GRIN3A</i> | glutamate receptor, ionotropic, N-methyl-D-aspartate 3A                 | Ionotropic glutamate receptors       |
| <i>GRIN3B</i> | glutamate receptor, ionotropic, N-methyl-D-aspartate 3B                 | Ionotropic glutamate receptors       |
| <i>HCN1</i>   | hyperpolarization activated cyclic nucleotide-gated potassium channel 1 | Cyclic nucleotide-regulated channels |
| <i>HCN2</i>   | hyperpolarization activated cyclic nucleotide-gated potassium channel 2 | Cyclic nucleotide-regulated channels |
| <i>HCN3</i>   | hyperpolarization activated cyclic nucleotide-gated potassium channel 3 | Cyclic nucleotide-regulated channels |
| <i>HCN4</i>   | hyperpolarization activated cyclic nucleotide-gated potassium channel 4 | Cyclic nucleotide-regulated channels |
| <i>HTR3A</i>  | 5-hydroxytryptamine (serotonin) receptor 3A, ionotropic                 | 5-HT <sub>3</sub> receptors          |
| <i>HTR3B</i>  | 5-hydroxytryptamine (serotonin) receptor 3B, ionotropic                 | 5-HT <sub>3</sub> receptors          |
| <i>HTR3C</i>  | 5-hydroxytryptamine (serotonin) receptor 3C, ionotropic                 | 5-HT <sub>3</sub> receptors          |
| <i>HTR3D</i>  | 5-hydroxytryptamine (serotonin) receptor 3D, ionotropic                 | 5-HT <sub>3</sub> receptors          |
| <i>HTR3E</i>  | 5-hydroxytryptamine (serotonin) receptor 3E, ionotropic                 | 5-HT <sub>3</sub> receptors          |
| <i>HVCN1</i>  | hydrogen voltage-gated channel 1                                        | Voltage-gated proton channel         |

| Gene symbol   | Gene title                                                                                          | Channel type                     |
|---------------|-----------------------------------------------------------------------------------------------------|----------------------------------|
| <i>KCNA1</i>  | potassium voltage-gated channel, shaker-related subfamily, member 1 (episodic ataxia with myokymia) | Voltage-gated potassium channels |
| <i>KCNA10</i> | potassium voltage-gated channel, shaker-related subfamily, member 10                                | Voltage-gated potassium channels |
| <i>KCNA2</i>  | potassium voltage-gated channel, shaker-related subfamily, member 2                                 | Voltage-gated potassium channels |
| <i>KCNA3</i>  | potassium voltage-gated channel, shaker-related subfamily, member 3                                 | Voltage-gated potassium channels |
| <i>KCNA4</i>  | potassium voltage-gated channel, shaker-related subfamily, member 4                                 | Voltage-gated potassium channels |
| <i>KCNA5</i>  | potassium voltage-gated channel, shaker-related subfamily, member 5                                 | Voltage-gated potassium channels |
| <i>KCNA6</i>  | potassium voltage-gated channel, shaker-related subfamily, member 6                                 | Voltage-gated potassium channels |
| <i>KCNA7</i>  | potassium voltage-gated channel, shaker-related subfamily, member 7                                 | Voltage-gated potassium channels |
| <i>KCNAB1</i> | potassium voltage-gated channel, shaker-related subfamily, beta member 1                            | Voltage-gated potassium channels |
| <i>KCNAB2</i> | potassium voltage-gated channel, shaker-related subfamily, beta member 2                            | Voltage-gated potassium channels |
| <i>KCNAB3</i> | potassium voltage-gated channel, shaker-related subfamily, beta member 3                            | Voltage-gated potassium channels |
| <i>KCNB1</i>  | potassium voltage-gated channel, Shab-related subfamily, member 1                                   | Voltage-gated potassium channels |
| <i>KCNB2</i>  | potassium voltage-gated channel, Shab-related subfamily, member 2                                   | Voltage-gated potassium channels |
| <i>KCNC1</i>  | potassium voltage-gated channel, Shaw-related subfamily, member 1                                   | Voltage-gated potassium channels |
| <i>KCNC2</i>  | potassium voltage-gated channel, Shaw-related subfamily, member 2                                   | Voltage-gated potassium channels |
| <i>KCNC3</i>  | potassium voltage-gated channel, Shaw-related subfamily, member 3                                   | Voltage-gated potassium channels |
| <i>KCNC4</i>  | potassium voltage-gated channel, Shaw-related subfamily, member 4                                   | Voltage-gated potassium channels |
| <i>KCND1</i>  | potassium voltage-gated channel, Shal-related subfamily, member 1                                   | Voltage-gated potassium channels |
| <i>KCND2</i>  | potassium voltage-gated channel, Shal-related subfamily, member 2                                   | Voltage-gated potassium channels |
| <i>KCND3</i>  | potassium voltage-gated channel, Shal-related subfamily, member 3                                   | Voltage-gated potassium channels |
| <i>KCNE1</i>  | potassium voltage-gated channel, Isk-related family, member 1                                       | Voltage-gated potassium channels |
| <i>KCNE1L</i> | KCNE1-like                                                                                          | Voltage-gated potassium channels |
| <i>KCNE2</i>  | potassium voltage-gated channel, Isk-related family, member 2                                       | Voltage-gated potassium channels |
| <i>KCNE3</i>  | potassium voltage-gated channel, Isk-related family, member 3                                       | Voltage-gated potassium channels |
| <i>KCNE4</i>  | potassium voltage-gated channel, Isk-related family, member 4                                       | Voltage-gated potassium channels |
| <i>KCNF1</i>  | potassium voltage-gated channel, subfamily F, member 1                                              | Voltage-gated potassium channels |
| <i>KCNG1</i>  | potassium voltage-gated channel, subfamily G, member 1                                              | Voltage-gated potassium channels |
| <i>KCNG2</i>  | potassium voltage-gated channel, subfamily G, member 2                                              | Voltage-gated potassium channels |
| <i>KCNG3</i>  | potassium voltage-gated channel, subfamily G, member 3                                              | Voltage-gated potassium channels |
| <i>KCNG4</i>  | potassium voltage-gated channel, subfamily G, member 4                                              | Voltage-gated potassium channels |

| Gene symbol   | Gene title                                                           | Channel type                           |
|---------------|----------------------------------------------------------------------|----------------------------------------|
| <i>KCNH1</i>  | potassium voltage-gated channel, subfamily H (eag-related), member 1 | Voltage-gated potassium channels       |
| <i>KCNH2</i>  | potassium voltage-gated channel, subfamily H (eag-related), member 2 | Voltage-gated potassium channels       |
| <i>KCNH3</i>  | potassium voltage-gated channel, subfamily H (eag-related), member 3 | Voltage-gated potassium channels       |
| <i>KCNH4</i>  | potassium voltage-gated channel, subfamily H (eag-related), member 4 | Voltage-gated potassium channels       |
| <i>KCNH5</i>  | potassium voltage-gated channel, subfamily H (eag-related), member 5 | Voltage-gated potassium channels       |
| <i>KCNH6</i>  | potassium voltage-gated channel, subfamily H (eag-related), member 6 | Voltage-gated potassium channels       |
| <i>KCNH7</i>  | potassium voltage-gated channel, subfamily H (eag-related), member 7 | Voltage-gated potassium channels       |
| <i>KCNH8</i>  | potassium voltage-gated channel, subfamily H (eag-related), member 8 | Voltage-gated potassium channels       |
| <i>KCNJ1</i>  | potassium inwardly-rectifying channel, subfamily J, member 1         | Inwardly rectifying potassium channels |
| <i>KCNJ10</i> | potassium inwardly-rectifying channel, subfamily J, member 10        | Inwardly rectifying potassium channels |
| <i>KCNJ11</i> | potassium inwardly-rectifying channel, subfamily J, member 11        | Inwardly rectifying potassium channels |
| <i>KCNJ12</i> | potassium inwardly-rectifying channel, subfamily J, member 12        | Inwardly rectifying potassium channels |
| <i>KCNJ13</i> | potassium inwardly-rectifying channel, subfamily J, member 13        | Inwardly rectifying potassium channels |
| <i>KCNJ14</i> | potassium inwardly-rectifying channel, subfamily J, member 14        | Inwardly rectifying potassium channels |
| <i>KCNJ15</i> | potassium inwardly-rectifying channel, subfamily J, member 15        | Inwardly rectifying potassium channels |
| <i>KCNJ16</i> | potassium inwardly-rectifying channel, subfamily J, member 16        | Inwardly rectifying potassium channels |
| <i>KCNJ18</i> | potassium inwardly-rectifying channel, subfamily J, member 18        | Inwardly rectifying potassium channels |
| <i>KCNJ2</i>  | potassium inwardly-rectifying channel, subfamily J, member 2         | Inwardly rectifying potassium channels |
| <i>KCNJ3</i>  | potassium inwardly-rectifying channel, subfamily J, member 3         | Inwardly rectifying potassium channels |
| <i>KCNJ4</i>  | potassium inwardly-rectifying channel, subfamily J, member 4         | Inwardly rectifying potassium channels |
| <i>KCNJ5</i>  | potassium inwardly-rectifying channel, subfamily J, member 5         | Inwardly rectifying potassium channels |
| <i>KCNJ6</i>  | potassium inwardly-rectifying channel, subfamily J, member 6         | Inwardly rectifying potassium channels |
| <i>KCNJ8</i>  | potassium inwardly-rectifying channel, subfamily J, member 8         | Inwardly rectifying potassium channels |
| <i>KCNJ9</i>  | potassium inwardly-rectifying channel, subfamily J, member 9         | Inwardly rectifying potassium channels |
| <i>KCNK1</i>  | potassium channel, subfamily K, member 1                             | Two-P potassium channels               |
| <i>KCNK10</i> | potassium channel, subfamily K, member 10                            | Two-P potassium channels               |
| <i>KCNK12</i> | potassium channel, subfamily K, member 12                            | Two-P potassium channels               |
| <i>KCNK13</i> | potassium channel, subfamily K, member 13                            | Two-P potassium channels               |
| <i>KCNK15</i> | potassium channel, subfamily K, member 15                            | Two-P potassium channels               |
| <i>KCNK16</i> | potassium channel, subfamily K, member 16                            | Two-P potassium channels               |

| Gene symbol   | Gene title                                                                                | Channel type                          |
|---------------|-------------------------------------------------------------------------------------------|---------------------------------------|
| <i>KCNK17</i> | potassium channel, subfamily K, member 17                                                 | Two-P potassium channels              |
| <i>KCNK18</i> | potassium channel, subfamily K, member 18                                                 | Two-P potassium channels              |
| <i>KCNK2</i>  | potassium channel, subfamily K, member 2                                                  | Two-P potassium channels              |
| <i>KCNK3</i>  | potassium channel, subfamily K, member 3                                                  | Two-P potassium channels              |
| <i>KCNK4</i>  | potassium channel, subfamily K, member 4                                                  | Two-P potassium channels              |
| <i>KCNK5</i>  | potassium channel, subfamily K, member 5                                                  | Two-P potassium channels              |
| <i>KCNK6</i>  | potassium channel, subfamily K, member 6                                                  | Two-P potassium channels              |
| <i>KCNK7</i>  | potassium channel, subfamily K, member 7                                                  | Two-P potassium channels              |
| <i>KCNK9</i>  | potassium channel, subfamily K, member 9                                                  | Two-P potassium channels              |
| <i>KCNMA1</i> | potassium large conductance calcium-activated channel, subfamily M, alpha member 1        | Calcium-activated potassium channels  |
| <i>KCNMB1</i> | potassium large conductance calcium-activated channel, subfamily M, beta member 1         | Calcium-activated potassium channels  |
| <i>KCNMB2</i> | potassium large conductance calcium-activated channel, subfamily M, beta member 2         | Calcium-activated potassium channels  |
| <i>KCNMB3</i> | potassium large conductance calcium-activated channel, subfamily M beta member 3          | Calcium-activated potassium channels  |
| <i>KCNMB4</i> | potassium large conductance calcium-activated channel, subfamily M, beta member 4         | Calcium-activated potassium channels  |
| <i>KCNN1</i>  | potassium intermediate/small conductance calcium-activated channel, subfamily N, member 1 | Calcium-activated potassium channels  |
| <i>KCNN2</i>  | potassium intermediate/small conductance calcium-activated channel, subfamily N, member 2 | Calcium-activated potassium channels  |
| <i>KCNN3</i>  | potassium intermediate/small conductance calcium-activated channel, subfamily N, member 3 | Calcium-activated potassium channels  |
| <i>KCNN4</i>  | potassium intermediate/small conductance calcium-activated channel, subfamily N, member 4 | Calcium-activated potassium channels  |
| <i>KCNQ1</i>  | potassium voltage-gated channel, KQT-like subfamily, member 1                             | Voltage-gated potassium channels      |
| <i>KCNQ2</i>  | potassium voltage-gated channel, KQT-like subfamily, member 2                             | Voltage-gated potassium channels      |
| <i>KCNQ3</i>  | potassium voltage-gated channel, KQT-like subfamily, member 3                             | Voltage-gated potassium channels      |
| <i>KCNQ4</i>  | potassium voltage-gated channel, KQT-like subfamily, member 4                             | Voltage-gated potassium channels      |
| <i>KCNQ5</i>  | potassium voltage-gated channel, KQT-like subfamily, member 5                             | Voltage-gated potassium channels      |
| <i>KCNS1</i>  | potassium voltage-gated channel, delayed-rectifier, subfamily S, member 1                 | Voltage-gated potassium channels      |
| <i>KCNS2</i>  | potassium voltage-gated channel, delayed-rectifier, subfamily S, member 2                 | Voltage-gated potassium channels      |
| <i>KCNS3</i>  | potassium voltage-gated channel, delayed-rectifier, subfamily S, member 3                 | Voltage-gated potassium channels      |
| <i>KCNT1</i>  | potassium channel, subfamily T, member 1                                                  | Calcium-activated potassium channels  |
| <i>KCNT2</i>  | potassium channel, subfamily T, member 2                                                  | Calcium-activated potassium channels  |
| <i>KCNU1</i>  | potassium channel, subfamily U, member 1                                                  | Calcium-activated potassium channels  |
| <i>KCNV1</i>  | potassium channel, subfamily V, member 1                                                  | Voltage-gated potassium channels      |
| <i>KCNV2</i>  | potassium channel, subfamily V, member 2                                                  | Voltage-gated potassium channels      |
| <i>MCOLN1</i> | mucolipin 1                                                                               | Transient receptor potential channels |

| Gene symbol   | Gene title                                                         | Channel type                          |
|---------------|--------------------------------------------------------------------|---------------------------------------|
| <i>MCOLN2</i> | mucolipin 2                                                        | Transient receptor potential channels |
| <i>MCOLN3</i> | mucolipin 3                                                        | Transient receptor potential channels |
| <i>NALCN</i>  | sodium leak channel, non-selective                                 | Voltage-independent cation channel    |
| <i>P2RX1</i>  | purinergic receptor P2X, ligand-gated ion channel, 1               | P2X receptors                         |
| <i>P2RX2</i>  | purinergic receptor P2X, ligand-gated ion channel, 2               | P2X receptors                         |
| <i>P2RX3</i>  | purinergic receptor P2X, ligand-gated ion channel, 3               | P2X receptors                         |
| <i>P2RX4</i>  | purinergic receptor P2X, ligand-gated ion channel, 4               | P2X receptors                         |
| <i>P2RX5</i>  | purinergic receptor P2X, ligand-gated ion channel, 5               | P2X receptors                         |
| <i>P2RX6</i>  | purinergic receptor P2X, ligand-gated ion channel, 6               | P2X receptors                         |
| <i>P2RX7</i>  | purinergic receptor P2X, ligand-gated ion channel, 7               | P2X receptors                         |
| <i>PKD1</i>   | polycystic kidney disease 1 (autosomal dominant)                   | Transient receptor potential channels |
| <i>PKD2</i>   | polycystic kidney disease 2 (autosomal dominant)                   | Transient receptor potential channels |
| <i>PKD2L1</i> | polycystic kidney disease 2-like 1                                 | Transient receptor potential channels |
| <i>PKD2L2</i> | polycystic kidney disease 2-like 2                                 | Transient receptor potential channels |
| <i>SCN10A</i> | sodium channel, voltage-gated, type X, alpha subunit               | Voltage-gated sodium channels         |
| <i>SCN11A</i> | sodium channel, voltage-gated, type XI, alpha subunit              | Voltage-gated sodium channels         |
| <i>SCN1A</i>  | sodium channel, voltage-gated, type I, alpha subunit               | Voltage-gated sodium channels         |
| <i>SCN1B</i>  | sodium channel, voltage-gated, type I, beta subunit                | Voltage-gated sodium channels         |
| <i>SCN2A</i>  | sodium channel, voltage-gated, type II, alpha subunit              | Voltage-gated sodium channels         |
| <i>SCN2B</i>  | sodium channel, voltage-gated, type II, beta subunit               | Voltage-gated sodium channels         |
| <i>SCN3A</i>  | sodium channel, voltage-gated, type III, alpha subunit             | Voltage-gated sodium channels         |
| <i>SCN3B</i>  | sodium channel, voltage-gated, type III, beta subunit              | Voltage-gated sodium channels         |
| <i>SCN4A</i>  | sodium channel, voltage-gated, type IV, alpha subunit              | Voltage-gated sodium channels         |
| <i>SCN4B</i>  | sodium channel, voltage-gated, type IV, beta subunit               | Voltage-gated sodium channels         |
| <i>SCN5A</i>  | sodium channel, voltage-gated, type V, alpha subunit               | Voltage-gated sodium channels         |
| <i>SCN7A</i>  | sodium channel, voltage-gated, type VII, alpha subunit             | Voltage-gated sodium channels         |
| <i>SCN8A</i>  | sodium channel, voltage gated, type VIII, alpha subunit            | Voltage-gated sodium channels         |
| <i>SCN9A</i>  | sodium channel, voltage-gated, type IX, alpha subunit              | Voltage-gated sodium channels         |
| <i>SCNN1A</i> | sodium channel, non-voltage-gated 1 alpha subunit                  | Nonvoltage-gated sodium channels      |
| <i>SCNN1B</i> | sodium channel, non-voltage-gated 1, beta subunit                  | Nonvoltage-gated sodium channels      |
| <i>SCNN1D</i> | sodium channel, non-voltage-gated 1, delta subunit                 | Nonvoltage-gated sodium channels      |
| <i>SCNN1G</i> | sodium channel, non-voltage-gated 1, gamma subunit                 | Nonvoltage-gated sodium channels      |
| <i>TPCN1</i>  | two pore segment channel 1                                         | CatSper and two-pore channels         |
| <i>TPCN2</i>  | two pore segment channel 2                                         | CatSper and two-pore channels         |
| <i>TRPA1</i>  | transient receptor potential cation channel, subfamily A, member 1 | Transient receptor potential channels |
| <i>TRPC1</i>  | transient receptor potential cation channel, subfamily C, member 1 | Transient receptor potential channels |
| <i>TRPC3</i>  | transient receptor potential cation channel, subfamily C, member 3 | Transient receptor potential channels |
| <i>TRPC4</i>  | transient receptor potential cation channel, subfamily C, member 4 | Transient receptor potential channels |
| <i>TRPC5</i>  | transient receptor potential cation channel, subfamily C, member 5 | Transient receptor potential channels |
| <i>TRPC6</i>  | transient receptor potential cation channel, subfamily C,          | Transient receptor potential          |

| Gene symbol  | Gene title                                                         | Channel type                          |
|--------------|--------------------------------------------------------------------|---------------------------------------|
|              | member 6                                                           | channels                              |
| <i>TRPC7</i> | transient receptor potential cation channel, subfamily C, member 7 | Transient receptor potential channels |
| <i>TRPM1</i> | transient receptor potential cation channel, subfamily M, member 1 | Transient receptor potential channels |
| <i>TRPM2</i> | transient receptor potential cation channel, subfamily M, member 2 | Transient receptor potential channels |
| <i>TRPM3</i> | transient receptor potential cation channel, subfamily M, member 3 | Transient receptor potential channels |
| <i>TRPM4</i> | transient receptor potential cation channel, subfamily M, member 4 | Transient receptor potential channels |
| <i>TRPM5</i> | transient receptor potential cation channel, subfamily M, member 5 | Transient receptor potential channels |
| <i>TRPM6</i> | transient receptor potential cation channel, subfamily M, member 6 | Transient receptor potential channels |
| <i>TRPM7</i> | transient receptor potential cation channel, subfamily M, member 7 | Transient receptor potential channels |
| <i>TRPM8</i> | transient receptor potential cation channel, subfamily M, member 8 | Transient receptor potential channels |
| <i>TRPV1</i> | transient receptor potential cation channel, subfamily V, member 1 | Transient receptor potential channels |
| <i>TRPV2</i> | transient receptor potential cation channel, subfamily V, member 2 | Transient receptor potential channels |
| <i>TRPV3</i> | transient receptor potential cation channel, subfamily V, member 3 | Transient receptor potential channels |
| <i>TRPV4</i> | transient receptor potential cation channel, subfamily V, member 4 | Transient receptor potential channels |
| <i>TRPV5</i> | transient receptor potential cation channel, subfamily V, member 5 | Transient receptor potential channels |
| <i>TRPV6</i> | transient receptor potential cation channel, subfamily V, member 6 | Transient receptor potential channels |
| <i>VDAC1</i> | voltage-dependent anion channel 1                                  | voltage-dependent anion channel       |
| <i>VDAC2</i> | voltage-dependent anion channel 2                                  | voltage-dependent anion channel       |
| <i>VDAC3</i> | voltage-dependent anion channel 3                                  | voltage-dependent anion channel       |
| <i>ZACN</i>  | zinc activated ligand-gated ion channel                            | ZAC                                   |
