# Supplementary material for: Ion Channel Gene Expression in Lung Adenocarcinoma: Potential Role in Prognosis and Diagnosis
Source: PubMed Central journal article supplement (PMC3900557; doi:10.1371/journal.pone.0086569), 2014-01-23
Supplement: pone.0086569.s010.pdf [file pone.0086569.s010.pdf]

Table S3. Comparison between the TWN and USA1 cohorts

|                                     | TWN             | USA1           | <i>P</i> -value          |
|-------------------------------------|-----------------|----------------|--------------------------|
| Age (mean $\pm$ standard deviation) | 60.9 $\pm$ 10.3 | 65.1 $\pm$ 8.5 | 0.042 by t-test          |
| Gender (male/female)                | 0/56            | 22/11          | < 0.001 by $\chi^2$ test |
| Never-smoker/ever-smoker            | 56/0            | 11/22          | < 0.001 by $\chi^2$ test |
