# Supplementary material for: Ion Channel Gene Expression in Lung Adenocarcinoma: Potential Role in Prognosis and Diagnosis
Source: PubMed Central journal article supplement (PMC3900557; doi:10.1371/journal.pone.0086569), 2014-01-23
Supplement: pone.0086569.s011.pdf [file pone.0086569.s011.pdf]

Table S4. Validation for the difference in gene expression level between normal and tumor tissues in the USA1 cohort

| Gene symbol     | Gene title                                                                        | Fold change <sup>a</sup> | Adjusted P-value <sup>b</sup> |
|-----------------|-----------------------------------------------------------------------------------|--------------------------|-------------------------------|
| <i>ANO1</i>     | anoctamin 1, calcium activated chloride channel                                   | 0.92                     | 7.3E-01                       |
| <i>CACNA1C</i>  | calcium channel, voltage-dependent, L type, alpha 1C subunit                      | 1.01                     | 4.6E-01                       |
| <i>CACNA1D</i>  | calcium channel, voltage-dependent, L type, alpha 1D subunit                      | 0.57                     | 7.3E-03                       |
| <i>CACNA2D2</i> | calcium channel, voltage-dependent, alpha 2/delta subunit 2                       | 0.08                     | 9.2E-11                       |
| <i>CACNB3</i>   | calcium channel, voltage-dependent, beta 3 subunit                                | 1.64                     | 5.5E-04                       |
| <i>CLCC1</i>    | chloride channel CLIC-like 1                                                      | 1.16                     | 3.8E-01                       |
| <i>CLCN3</i>    | chloride channel, voltage-sensitive 3                                             | 1.37                     | 4.8E-03                       |
| <i>CLCN7</i>    | chloride channel, voltage-sensitive 7                                             | 1.41                     | 6.4E-05                       |
| <i>CLIC3</i>    | chloride intracellular channel 3                                                  | 0.08                     | 2.9E-12                       |
| <i>CLIC4</i>    | chloride intracellular channel 4                                                  | 0.62                     | 1.8E-05                       |
| <i>CLIC5</i>    | chloride intracellular channel 5                                                  | 0.05                     | 6.2E-13                       |
| <i>KCNAB1</i>   | potassium voltage-gated channel, shaker-related subfamily, beta member 1          | 0.37                     | 3.6E-07                       |
| <i>KCNAB2</i>   | potassium voltage-gated channel, shaker-related subfamily, beta member 2          | 0.49                     | 2.9E-07                       |
| <i>KCNJ2</i>    | potassium inwardly-rectifying channel, subfamily J, member 2                      | 0.55                     | 6.5E-03                       |
| <i>KCNJ8</i>    | potassium inwardly-rectifying channel, subfamily J, member 8                      | 0.43                     | 4.5E-11                       |
| <i>KCNK1</i>    | potassium channel, subfamily K, member 1                                          | 5.29                     | 4.2E-08                       |
| <i>KCNK3</i>    | potassium channel, subfamily K, member 3                                          | 0.03                     | 1.2E-20                       |
| <i>KCNK5</i>    | potassium channel, subfamily K, member 5                                          | 2.12                     | 2.9E-04                       |
| <i>KCNMB4</i>   | potassium large conductance calcium-activated channel, subfamily M, beta member 4 | 1.00                     | 9.7E-01                       |
| <i>KCNQ3</i>    | potassium voltage-gated channel, KQT-like subfamily, member 3                     | 1.06                     | 1.4E-01                       |
| <i>MCOLN1</i>   | mucolipin 1                                                                       | 0.45                     | 1.8E-05                       |
| <i>MCOLN3</i>   | mucolipin 3                                                                       | 0.78                     | 9.4E-02                       |
| <i>PKD1</i>     | polycystic kidney disease 1 (autosomal dominant)                                  | 0.59                     | 2.2E-06                       |
| <i>PKD2</i>     | polycystic kidney disease 2 (autosomal dominant)                                  | 0.76                     | 3.4E-03                       |
| <i>SCN7A</i>    | sodium channel, voltage-gated, type VII, alpha subunit                            | 0.81                     | 5.5E-02                       |
| <i>SCNN1B</i>   | sodium channel, non-voltage-gated 1, beta subunit                                 | 0.26                     | 3.0E-06                       |
| <i>SCNN1G</i>   | sodium channel, non-voltage-gated 1, gamma subunit                                | 1.00                     | 3.8E-01                       |
| <i>TPCN1</i>    | two pore segment channel 1                                                        | 1.05                     | 4.7E-01                       |
| <i>TRPC1</i>    | transient receptor potential cation channel, subfamily C, member 1                | 0.64                     | 4.7E-03                       |
| <i>TRPC6</i>    | transient receptor potential cation channel, subfamily C, member 6                | 0.63                     | 2.8E-02                       |
| <i>TRPM2</i>    | transient receptor potential cation channel, subfamily M, member 2                | 1.06                     | 1.2E-01                       |
| <i>TRPV2</i>    | transient receptor potential cation channel, subfamily V, member 2                | 0.27                     | 5.4E-12                       |
| <i>VDAC1</i>    | voltage-dependent anion channel 1                                                 | 1.54                     | 2.8E-05                       |

<sup>a</sup> Fold change is calculated by dividing the expression of tumor tissue by the expression of normal tissue.

<sup>b</sup> P-value is calculated by paired t-test and adjusted by Benjamini & Hochberg correction.
