# Supplementary material for: Ion Channel Gene Expression in Lung Adenocarcinoma: Potential Role in Prognosis and Diagnosis
Source: PubMed Central journal article supplement (PMC3900557; doi:10.1371/journal.pone.0086569), 2014-01-23
Supplement: pone.0086569.s012.pdf [file pone.0086569.s012.pdf]

Table S5. Univariate Cox proportional hazards regression of survival by iLAS continuous score for the lung adenocarcinoma patients

| Category                 | Cohort | Number of patients | Hazard ratio | 95% Confidence interval | <i>P</i> -value |
|--------------------------|--------|--------------------|--------------|-------------------------|-----------------|
| Overall survival         | USA2   | 58                 | 1.02         | (0.99, 1.06)            | 0.142           |
|                          | JPN    | 226                | 1.04         | (1.01, 1.06)            | 0.002           |
| Recurrence-free survival | KOR    | 63                 | 1.03         | (1.00, 1.07)            | 0.087           |
|                          | JPN    | 226                | 1.04         | (1.02, 1.06)            | < 0.001         |
