# Supplementary material for: Ion Channel Gene Expression in Lung Adenocarcinoma: Potential Role in Prognosis and Diagnosis
Source: PubMed Central journal article supplement (PMC3900557; doi:10.1371/journal.pone.0086569), 2014-01-23
Supplement: pone.0086569.s013.pdf [file pone.0086569.s013.pdf]

Table S6. Means, medians, and standard deviations of iLAS risk score for the patients with and without smoking history in the USA2 and JPN cohorts

|                    | USA2         |             | JPN          |             |
|--------------------|--------------|-------------|--------------|-------------|
|                    | Never-smoker | Ever-smoker | Never-smoker | Ever-smoker |
| Mean               | -3.46        | 1.69        | -2.92        | 3.03        |
| Median             | -2.31        | 0.23        | -2.05        | 4.05        |
| Standard deviation | 9.11         | 8.52        | 15.58        | 15.28       |
