# Supplementary material for: Ion Channel Gene Expression in Lung Adenocarcinoma: Potential Role in Prognosis and Diagnosis
Source: PubMed Central journal article supplement (PMC3900557; doi:10.1371/journal.pone.0086569), 2014-01-23
Supplement: pone.0086569.s014.pdf [file pone.0086569.s014.pdf]

Table S7. Multivariate Cox proportional hazard regression of survival for the patients from the JPN cohort

| Covariate         | Overall survival |                         |                 | Recurrence-free survival |                         |                 |
|-------------------|------------------|-------------------------|-----------------|--------------------------|-------------------------|-----------------|
|                   | Hazard ratio     | 95% Confidence interval | <i>P</i> -value | Hazard ratio             | 95% Confidence interval | <i>P</i> -value |
| iLAS <sup>a</sup> | 1.02             | (1.00, 1.05)            | 0.017           | 1.03                     | (1.01, 1.05)            | < 0.001         |
| Age               | 1.03             | (0.98, 1.08)            | 0.291           | 1.03                     | (1.00, 1.07)            | 0.067           |
| Gender M vs.F     | 0.83             | (0.32, 2.12)            | 0.693           | 0.77                     | (0.38, 1.53)            | 0.454           |
| Stage             | 2.22             | (1.44, 3.43)            | < 0.001         | 2.06                     | (1.50, 2.82)            | < 0.001         |
| Smoking + vs. -   | 1.10             | (0.42, 2.86)            | 0.844           | 0.97                     | (0.48, 1.95)            | 0.927           |
| Myc high vs. low  | 0.61             | (0.14, 2.62)            | 0.506           | 1.06                     | (0.41, 2.74)            | 0.904           |
| Mutation + vs. -  | 0.50             | (0.25, 1.00)            | 0.049           | 0.59                     | (0.35, 0.99)            | 0.043           |

<sup>a</sup> iLAS status was treated as continuous variable.
