# Supplementary material for: Ion Channel Gene Expression in Lung Adenocarcinoma: Potential Role in Prognosis and Diagnosis
Source: PubMed Central journal article supplement (PMC3900557; doi:10.1371/journal.pone.0086569), 2014-01-23
Supplement: pone.0086569.s015.pdf [file pone.0086569.s015.pdf]

Table S8. Means, medians, and standard deviations of iLAS risk score for the adenocarcinoma and squamous-cell carcinoma patients in the USA2 and KOR cohorts

|                    | USA2           |                         | KOR            |                         |
|--------------------|----------------|-------------------------|----------------|-------------------------|
|                    | adenocarcinoma | squamous-cell carcinoma | adenocarcinoma | squamous-cell carcinoma |
| Mean               | -1.69          | 1.85                    | -1.19          | 1.00                    |
| Median             | -2.06          | 4.74                    | 1.13           | 4.38                    |
| Standard deviation | 10.90          | 13.50                   | 11.46          | 12.84                   |
