# Supplementary material for: Ion Channel Gene Expression in Lung Adenocarcinoma: Potential Role in Prognosis and Diagnosis
Source: PubMed Central journal article supplement (PMC3900557; doi:10.1371/journal.pone.0086569), 2014-01-23
Supplement: pone.0086569.s016.pdf [file pone.0086569.s016.pdf]

Table S9. Validation for the difference in gene expression level between adenocarcinoma and squamous-cell carcinoma in the USA2 and KOR cohorts

| Gene symbol     | USA2                     |                                       | KOR                      |                                       |
|-----------------|--------------------------|---------------------------------------|--------------------------|---------------------------------------|
|                 | Fold change <sup>a</sup> | Adjusted <i>P</i> -value <sup>b</sup> | Fold change <sup>a</sup> | Adjusted <i>P</i> -value <sup>b</sup> |
| <i>CACNA1D</i>  | 1.83                     | 1.4E-07                               | 1.62                     | 6.7E-06                               |
| <i>CACNA2D1</i> | 0.49                     | 4.3E-05                               | 0.35                     | 2.0E-06                               |
| <i>CACNA2D2</i> | 1.37                     | 1.5E-01                               | 4.31                     | 2.1E-05                               |
| <i>CACNB3</i>   | 1.50                     | 6.2E-05                               | 1.31                     | 4.1E-03                               |
| <i>CLCC1</i>    | 1.14                     | 4.2E-02                               | 1.27                     | 7.7E-04                               |
| <i>CLCN7</i>    | 1.25                     | 8.4E-03                               | 1.47                     | 7.7E-10                               |
| <i>CLIC1</i>    | 1.10                     | 2.6E-01                               | 1.26                     | 7.7E-04                               |
| <i>CLIC4</i>    | 0.95                     | 5.7E-01                               | 0.90                     | 7.6E-02                               |
| <i>CLIC5</i>    | 1.07                     | 1.7E-02                               | 2.00                     | 1.3E-05                               |
| <i>CLIC6</i>    | 3.10                     | 7.6E-04                               | 7.30                     | 2.2E-08                               |
| <i>GLRB</i>     | 1.27                     | 1.4E-02                               | 2.31                     | 8.8E-09                               |
| <i>KCNJ2</i>    | 0.63                     | 5.6E-03                               | 0.39                     | 2.4E-07                               |
| <i>KCNJ8</i>    | 1.32                     | 2.6E-02                               | 0.79                     | 7.2E-01                               |
| <i>KCNK1</i>    | 0.83                     | 3.2E-01                               | 0.78                     | 8.8E-02                               |
| <i>KCNK17</i>   | 1.19                     | 1.4E-02                               | 2.04                     | 1.9E-02                               |
| <i>KCNK5</i>    | 3.26                     | 5.0E-12                               | 11.52                    | 6.4E-21                               |
| <i>KCNQ3</i>    | 1.55                     | 4.3E-06                               | 2.20                     | 2.1E-07                               |
| <i>MCOLN3</i>   | 0.72                     | 5.9E-02                               | 0.77                     | 7.4E-02                               |
| <i>P2RX4</i>    | 1.27                     | 3.4E-02                               | 1.85                     | 2.9E-08                               |
| <i>SCN7A</i>    | 1.56                     | 2.7E-03                               | 2.29                     | 1.0E-06                               |
| <i>SCNNIA</i>   | 1.97                     | 9.6E-05                               | 1.78                     | 5.6E-04                               |
| <i>SCNNIB</i>   | 1.71                     | 1.4E-02                               | 4.19                     | 9.3E-10                               |
| <i>SCNNIG</i>   | 1.25                     | 1.7E-01                               | 1.84                     | 7.7E-04                               |
| <i>TPCN1</i>    | 1.55                     | 5.9E-08                               | 1.78                     | 2.1E-13                               |
| <i>TRPC6</i>    | 1.98                     | 4.3E-05                               | 1.32                     | 7.5E-02                               |
| <i>TRPM7</i>    | 0.87                     | 4.9E-02                               | 0.75                     | 1.0E-06                               |
| <i>TRPV2</i>    | 1.26                     | 7.0E-03                               | 1.08                     | 1.4E-01                               |
| <i>VDAC1</i>    | 0.82                     | 2.2E-02                               | 0.87                     | 6.5E-03                               |
| <i>VDAC2</i>    | 0.62                     | 2.1E-04                               | 0.51                     | 3.6E-11                               |
| <i>VDAC3</i>    | 0.76                     | 2.0E-03                               | 0.68                     | 1.2E-04                               |

<sup>a</sup> Fold change is calculated by dividing the expression in adenocarcinoma by the expression in squamous-cell carcinoma.

<sup>b</sup> *P*-value is calculated by two-tailed t-test and adjusted by Benjamini & Hochberg correction.
